# Supplementary material
Source: publisher site journal article supplement (https://www.dovepress.com/article/476163)
Supplement: Supplementary file 1 [file get_supplementary_file.php]

**Supplemental Table S1: Adverse Events by SOC and PTs.**

| **SOC** | **PT** | **Placebo** | | **Tacrosolv** | | **Total number of AE** | | |
| --- | --- | --- | --- | --- | --- | --- | --- | --- |
| **N** | **%** | **N** | **%** | **N** | **%** | |
| Eye disorders | | 26 | 14.94 | 132 | 75.86 | 158 | 90.80 | |
|  | Eye irritation | 13 | 7.47 | 60 | 34.48 | 73 | 41.95 | |
|  | Lacrimation increased | 1 | 0.57 | 14 | 8.05 | 15 | 8.62 | |
|  | Dry eye | 1 | 0.57 | 14 | 8.05 | 15 | 8.62 | |
|  | Eye pruritus | 5 | 2.87 | 9 | 5.17 | 14 | 8.05 | |
|  | Ocular hyperaemia | 3 | 1.72 | 9 | 5.17 | 12 | 6.90 | |
|  | Photophobia | 1 | 0.57 | 9 | 5.17 | 10 | 5.75 | |
|  | Abnormal sensation in eye | 0 | 0.00 | 6 | 3.45 | 6 | 3.45 | |
|  | Eye swelling | 1 | 0.57 | 5 | 2.87 | 6 | 3.45 | |
|  | Eyelid irritation | 0 | 0.00 | 2 | 1.15 | 2 | 1.15 | |
|  | Asthenopia | 0 | 0.00 | 1 | 0.57 | 1 | 0.57 | |
|  | Blepharitis | 0 | 0.00 | 1 | 0.57 | 1 | 0.57 | |
|  | Eyelids pruritus | 0 | 0.00 | 1 | 0.57 | 1 | 0.57 | |
|  | Foreign body sensation in eyes | 0 | 0.00 | 1 | 0.57 | 1 | 0.57 | |
|  | Ocular discomfort | 1 | 0.57 | 0 | 0.00 | 1 | 0.57 | |
| Nervous system disorders | | 1 | 0.57 | 6 | 3.45 | 7 | 4.02 | |
|  | Disturbance in attention | 0 | 0.00 | 1 | 0.57 | 1 | 0.57 | |
|  | Headache | 1 | 0.57 | 4 | 2.30 | 5 | 2.87 | |
|  | Migraine | 0 | 0.00 | 1 | 0.57 | 1 | 0.57 | |
| Infections and infestations | | 2 | 1.15 | 2 | 1.15 | 4 | 2.30 | |
|  | Conjunctivitis | 1 | 0.57 | 0 | 0.00 | 1 | 0.57 | |
|  | Influenza | 0 | 0.00 | 1 | 0.57 | 1 | 0.57 | |
|  | Nasopharyngitis | 1 | 0.57 | 0 | 0.00 | 1 | 0.57 | |
|  | Pneumonia | 0 | 0.00 | 1 | 0.57 | 1 | 0.57 | |
| Immune system disorders | | 1 | 0.57 | 2 | 1.15 | 3 | 1.72 | |
|  | Hypersensitivity | 1 | 0.57 | 2 | 1.15 | 3 | 1.72 | |
| Gastrointestinal disorders | | 0 | 0.00 | 1 | 0.57 | 1 | 0.57 | |
|  | Toothache | 0 | 0.00 | 1 | 0.57 | 1 | 0.57 | |
| Injury, poisoning and procedural complications | | 0 | 0.00 | 1 | 0.57 | 1 | 0.57 | |
|  | Barotrauma | 0 | 0.00 | 1 | 0.57 | 1 | 0.57 | |
| **Total** | | **30** | **17.24** | **144** | **82.76** | **174** | **100.00** | |
| Note: Percentages are calculated related to total number of adverse events (N=174). | | | | | | | |

SOC, System organ class; PT, Preferred term.
